# Supplementary material for: Identification and Validation of a Stable Major-Effect Quantitative Trait Locus for Kernel Number per Spike on Chromosome 2D in Wheat (Triticum aestivum L.)
Source: MDPI journal article supplement (doi:10.3390/ijms241814289), 2023-09-19
Supplement: s1 [file s1]

**Table S1** The results of eQTLs

| Year | eQTL1                | Position1<br>(cM) | eQTL2                  | Position2<br>(cM) | LOD  | PVE<br>(%) | ADDby<br>ADD |
|------|----------------------|-------------------|------------------------|-------------------|------|------------|--------------|
| 2019 | <i>eQKnps.sau-2D</i> | 280               | <i>eQKnps.sau-4D.1</i> | 215               | 5.08 | 6.33       | -2.83        |
| 2019 | <i>eQKnps.sau-2B</i> | 175               | <i>eQKnps.sau-4D.2</i> | 220               | 5.65 | 8.73       | -3.27        |
| 2019 | <i>eQKnps.sau-3B</i> | 15                | <i>eQKnps.sau-5A</i>   | 0                 | 5.29 | 5.90       | -2.10        |
| Mean | <i>eQKnps.sau-1D</i> | 165               | <i>eQKnps.sau-5D</i>   | 85                | 5.02 | 8.04       | 1.40         |

**Table S2** Kompetitive allele-specific PCR (KASP) markers *for QKnps.sau-2D.1*

| Marker                       | Sequences (5' to 3')                               |
|------------------------------|----------------------------------------------------|
| <i>KASP-AX-111462389-FAM</i> | <b>GAAGGTGACCAAGTTCATGCTACCACAAGTGTTTTCGTTTTGT</b> |
| <i>KASP-AX-111462389-HEX</i> | <b>GAAGGTCGGAGTCAACGGATTACCACAAGTGTTTTCGTTTTGG</b> |
| <i>KASP-AX-111462389-R</i>   | <b>GACAAAGCACGAAAAGTCC</b>                         |

Note: The FAM probe sequence of the forward primer was GAAGGTGACCAAGTTCATGCT, and the HEX probe sequence of the reverse primer was GAAGGTCGGAGTCAACGGATT

**Table S3** The re-mapping results of *QKnps.sau-2D.1*

| QTL                   | Environment | Interval (cM) | Left Marker         | Right Marker        | LOD   | PVE<br>(%) | Add  |
|-----------------------|-------------|---------------|---------------------|---------------------|-------|------------|------|
| <i>QKnps.sau-2D.1</i> | 2016        | 76.5-77.5     | <i>AX-109283238</i> | <i>AX-111606890</i> | 15.19 | 16.13      | 2.21 |
|                       | 2019        | 76.5-77.5     | <i>AX-109283238</i> | <i>AX-111606890</i> | 7.99  | 10.24      | 2.54 |
|                       | 2021        | 76.5-77.5     | <i>AX-109283238</i> | <i>AX-111606890</i> | 9.87  | 11.77      | 2.63 |
|                       | Mean        | 76.5-77.5     | <i>AX-109283238</i> | <i>AX-111606890</i> | 12.72 | 15.90      | 2.01 |

**Table S4** The results of phenotyping and genotyping by *KASP-AX-111462389* in the CN18 x T1208 RIL population

| QTL                   | Environment | Genotype <i>aa</i> | Genotype <i>AA</i> | Difference | <i>P</i> value |
|-----------------------|-------------|--------------------|--------------------|------------|----------------|
| <i>QKnps.sau-2D.1</i> | 2016        | 37.36(n=148)       | 43.29(n=175)       | 5.92       | $P<0.001$      |
|                       | 2019        | 62.53(n=148)       | 68.64(n=175)       | 6.11       | $P<0.001$      |
|                       | 2021        | 57.80(n=148)       | 63.56(n=175)       | 5.76       | $P<0.001$      |
|                       | mean        | 52.54(n=148)       | 58.41(n=175)       | 5.87       | $P<0.001$      |

**Table S5** The results of phenotyping and genotyping by *KASP-AX-111462389* in the CN17 x CN11 RIL population

| QTL                   | Genotype <i>aa</i> | Genotype <i>AA</i> | Difference | <i>P</i> value |
|-----------------------|--------------------|--------------------|------------|----------------|
| <i>QKnps.sau-2D.1</i> | 41.45 (n=60)       | 46.93(n=42)        | 5.48       | $P < 0.05$     |

**Table S6** The 15 genes in the interval of the QTL

| Gene ID name              | Annotation                                       |
|---------------------------|--------------------------------------------------|
| <i>TraesCS2D02G138100</i> | Hepatoma-derived growth factor-related protein 2 |
| <i>TraesCS2D02G138200</i> | Transmembrane protein 115                        |
| <i>TraesCS2D02G138300</i> | BTB-POZ and MATH domain protein                  |
| <i>TraesCS2D02G138400</i> | Terpene synthase                                 |
| <i>TraesCS2D02G138500</i> | Terpene synthase                                 |
| <i>TraesCS2D02G138600</i> | Terpene synthase                                 |
| <i>TraesCS2D02G138700</i> | carboxyl-terminal peptidase, putative (DUF239)   |
| <i>TraesCS2D02G138800</i> | Lipase                                           |
| <i>TraesCS2D02G138900</i> | ARM repeat superfamily protein                   |
| <i>TraesCS2D02G139000</i> | cDNA, clone: J075123K08, full insert sequence    |
| <i>TraesCS2D02G139100</i> | Terpene synthase                                 |
| <i>TraesCS2D02G139200</i> | Cysteine desulfurase                             |
| <i>TraesCS2D02G139300</i> | Microtubule-actin cross-linking factor 1         |
| <i>TraesCS2D02G139400</i> | Chaperone protein dnaJ-related                   |
| <i>TraesCS2D02G139500</i> | Chaperone protein dnaJ-related                   |
